# Supplementary material for: Methyl N-phenyl carbamate synthesis over Zn/Al/Ce mixed oxide derived from hydrotalcite-like precursors
Source: Royal Society of Chemistry journal article supplement (doi:10.1039/c9ra09642f), 2019-01-01
Supplement: c9ra09642f1.pdf [file c9ra09642f1.pdf]

## Supplementary Information for

### Methyl N-phenyl carbamate synthesis over Zn/Al/Ce mixed oxide derived from hydrotalcite-like precursors

Min Kang,<sup>a</sup> Hai Zhou,<sup>a\*</sup> Dajiang Tang,<sup>a</sup> Xiaomei Chen,<sup>a</sup> Ying Guo,<sup>a</sup> Ning Zhao<sup>b\*</sup>

<sup>a</sup> Department of Chemistry and Chemical Engineering, Zunyi Normal College, Zunyi  
563002, China

<sup>b</sup> State Key Laboratory of Coal Conversion, Institute of Coal Chemistry, Chinese  
Academy of Sciences, Taiyuan 030001, China.

\*Corresponding author (Dr. Hai Zhou). Tel: +86-0851-28924799; Fax: +86-0851-  
28924799; E-mail: 591658314@163.com

\*Co-corresponding author (Dr. Ning Zhao). Tel: +86-0351-4063121; Fax: +86-0351-  
4041153; E-mail: Zhaoning@sxicc.ac.cn

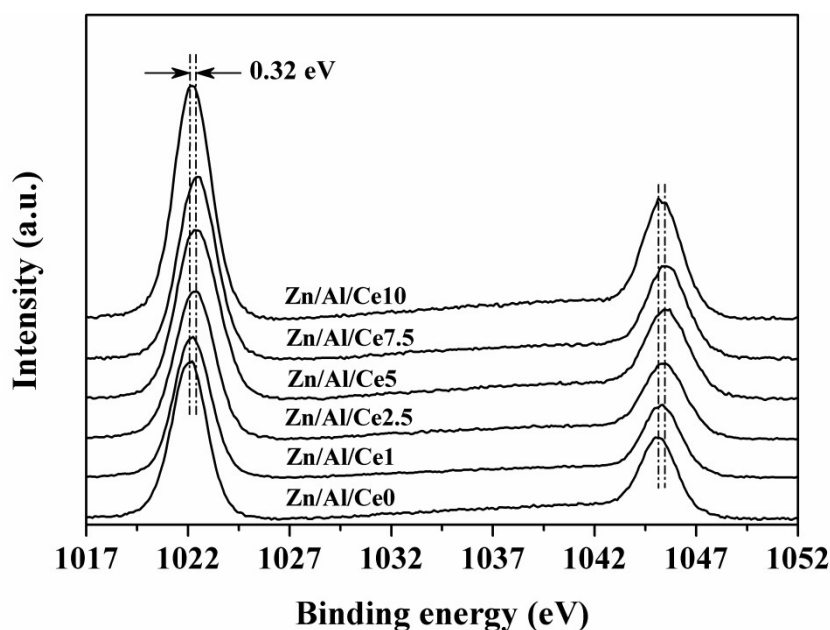

Fig. S1 XPS of Zn 2p core-level for the catalysts with different cerium content.

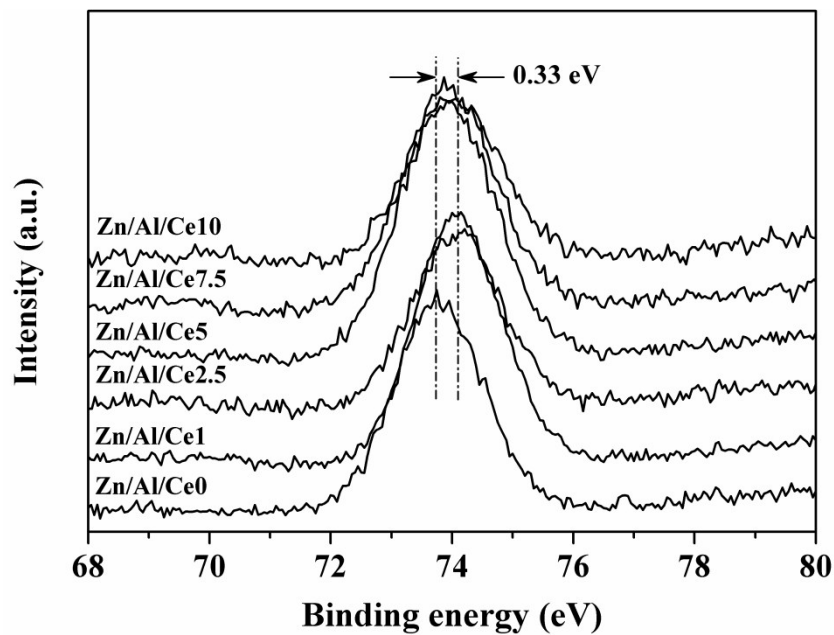

Fig. S2 XPS of Al 2p core-level for the catalysts with different cerium content.

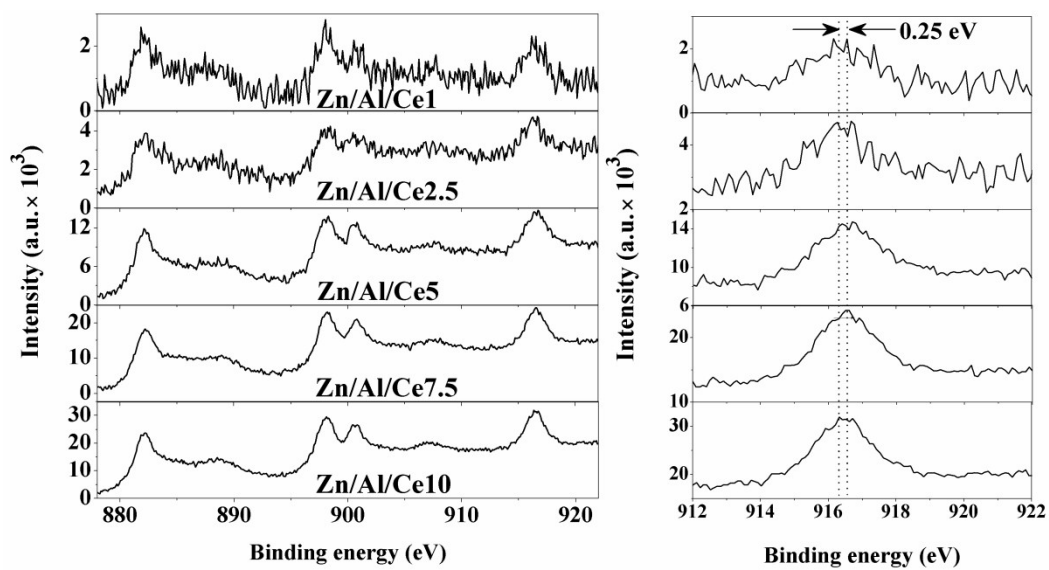

Fig. S3 XPS of Ce 3d core-level for the catalysts with different cerium content.

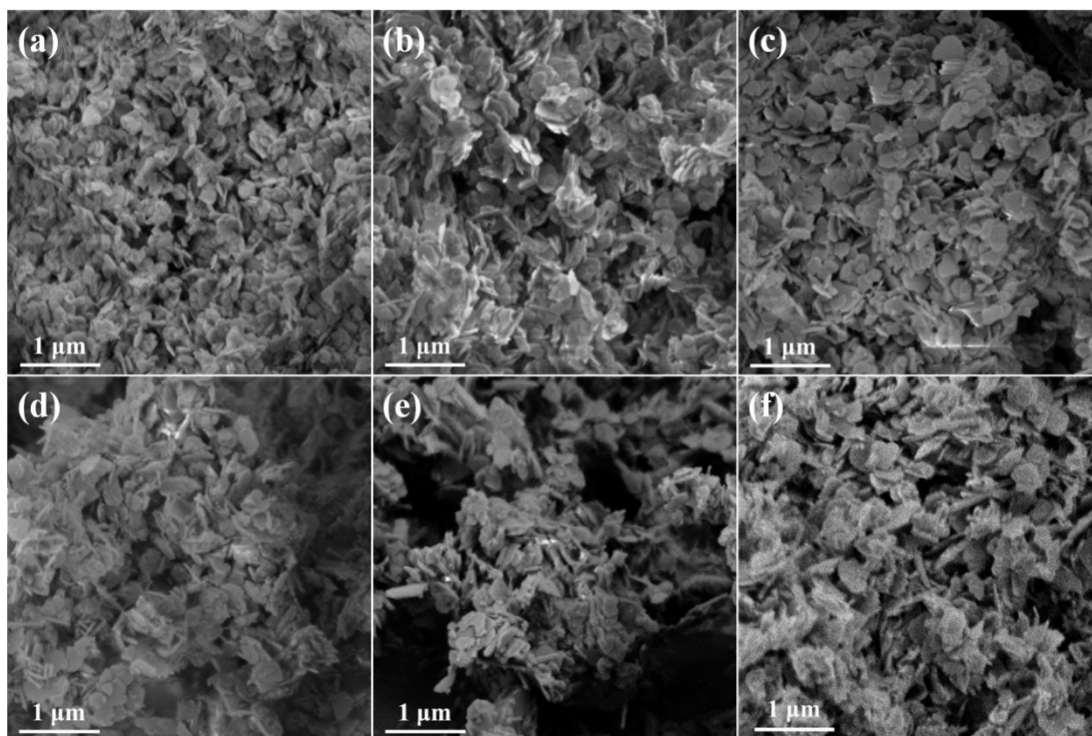

Fig. S4 SEM images of the uncalcined Zn/Al/Ce HTlcs precursors (a) Zn/Al/Ce0, (b) Zn/Al/Ce1, (c) Zn/Al/Ce2.5, (d) Zn/Al/Ce5, (e) Zn/Al/Ce7.5 and (f) Zn/Al/Ce10.

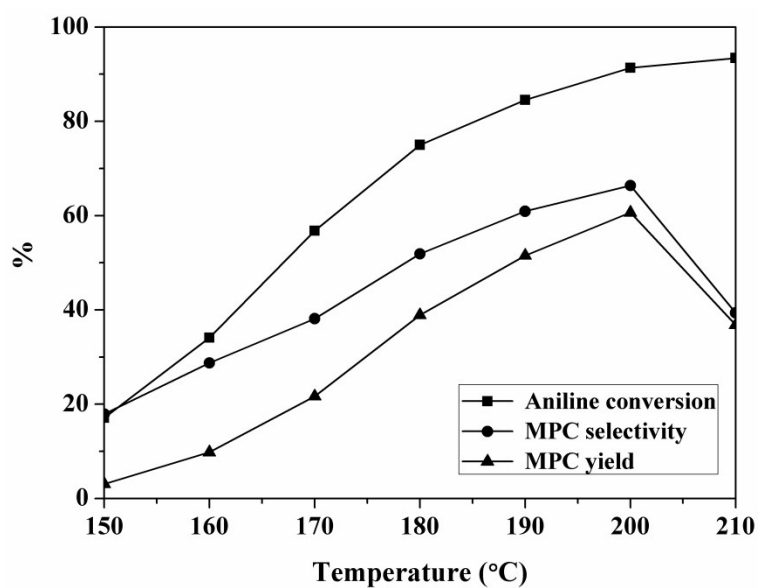

Fig. S5 Effect of reaction temperature on aniline conversion, MPC selectivity and MPC yield. Reaction conditions: DMC 19.35 g, aniline 1 g (molar ratio of DMC to aniline is 20), catalyst 0.253 g, reaction time 7 h.

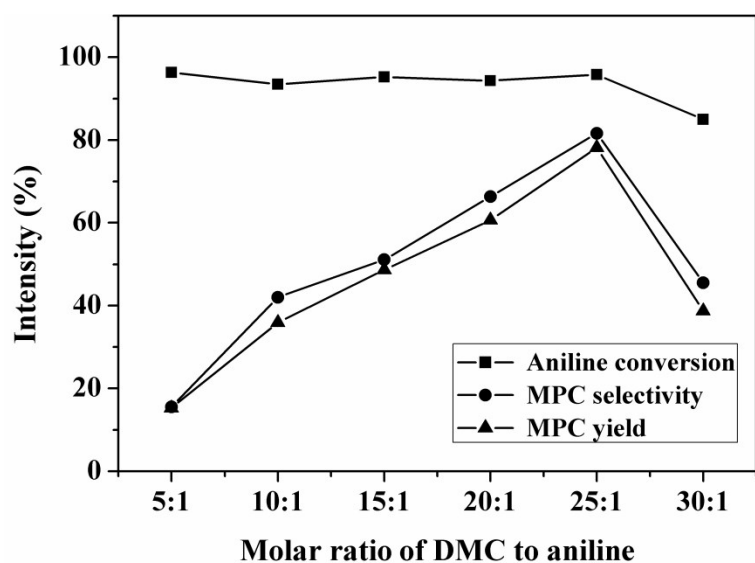

Fig. S6 Effect of the molar ratio of DMC to aniline on aniline conversion, MPC selectivity and MPC yield. Reaction conditions: DMC 19.35 g, catalyst 0.253 g, reaction temperature 200 °C, reaction time 7 h.

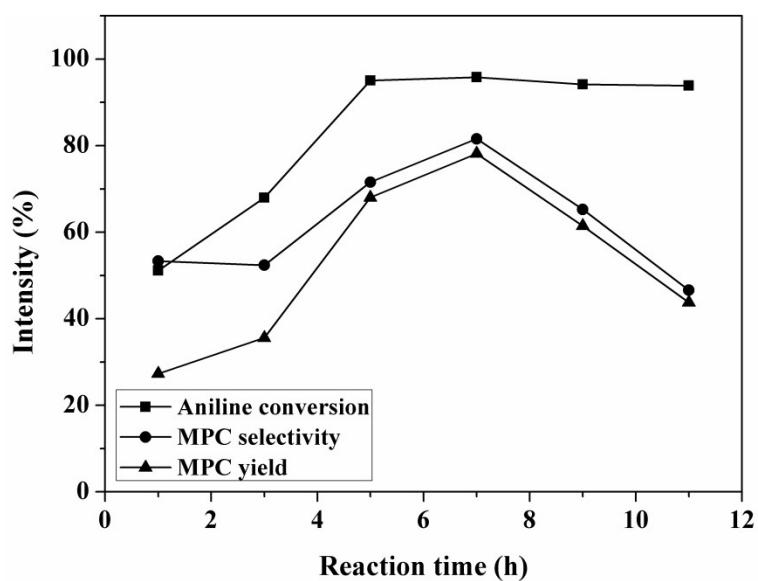

Fig. S7 Effect of reaction time on aniline conversion, MPC selectivity and MPC yield. Reaction conditions: DMC 19.35 g, aniline 0.8 g (molar ratio of DMC to aniline is 25), catalyst 0.253 g, reaction temperature 200 °C.

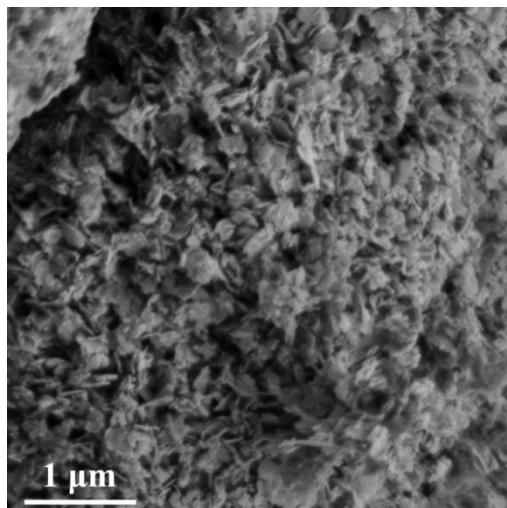

Fig. S8 SEM image of Zn/Al/Ce2.5 after 5 times cyclic test.

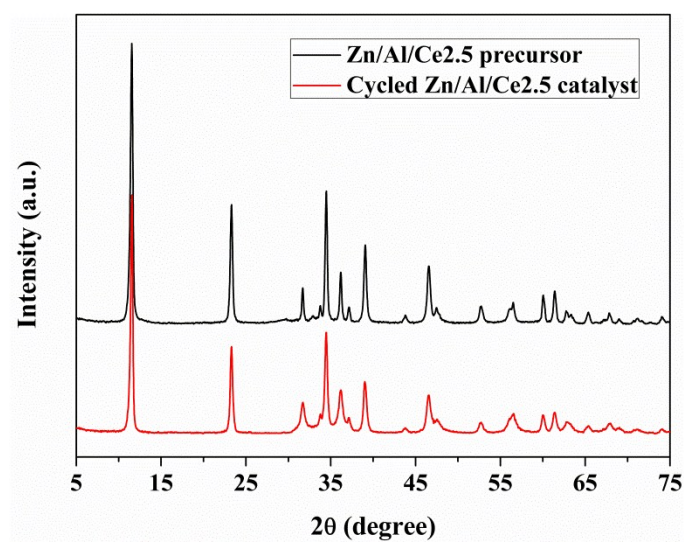

Fig. S9 XRD pattern of Zn/Al/Ce2.5 after the cyclic test. For comparison, the XRD pattern of Zn/Al/Ce2.5 precursor is also presented.
